# Supplementary material for: Tuning the assembly of amphiphilic block copolymers through instabilities of solvent/water interfaces in the presence of aqueous surfactants
Source: Royal Society of Chemistry journal article supplement (doi:10.1039/b818065b), 2009-01-01
Supplement: b818065b.pdf [file b818065b.pdf]

*Electronic Supplementary Information for:*

**Tuning the assembly of amphiphilic block copolymers through instabilities of solvent/water interfaces in the presence of aqueous surfactants**

Jintao Zhu,<sup>a</sup> Nangelie Ferrer,<sup>b</sup> and Ryan C. Hayward<sup>\*a</sup>

<sup>a</sup>Department of Polymer Science and Engineering,

University of Massachusetts, Amherst, MA 01003

<sup>b</sup>Springfield Technical Community College, Springfield, MA 01102

\*E-mail: [rhayward@mail.pse.umass.edu](mailto:rhayward@mail.pse.umass.edu)

**Supporting Movies.** Real-time movies of shrinking emulsion droplets recorded using bright-field optical microscopy with a 100x oil-immersion objective. Each movie shows the behavior of chloroform droplets (sizes  $\sim 2 - 10 \mu\text{m}$ ) containing PS<sub>37k</sub>-PEO<sub>6.5k</sub>, with differing concentrations of SDS in the aqueous phase:

**Movie 1:** 0.1 mg.cm<sup>-3</sup> SDS. No instability is observed, though crumpling of the droplets is seen in the last stages of solvent removal.

**Movie 2:** 0.7 mg.cm<sup>-3</sup> SDS. Vesicles can be seen to bud from the droplet surface.

**Movie 3:** 1 mg.cm<sup>-3</sup> SDS. Cylindrical micelles are formed.

**Movie 4:** 5 mg.cm<sup>-3</sup> SDS. Droplets repeatedly split, generating spherical micelles.
